# Supplementary material for: Optimisation of the World Ocean Model of Biogeochemistry and Trophic-dynamics (WOMBAT) using surrogate machine learning methods
Source: Copernicus journal article supplement (doi:10.5194/egusphere-2024-4026), 2025-02-04
Supplement: Supplementary file [file egusphere-2024-4026-AC3-supplement.pdf]

## Overview

### Research summary

(1) In this paper, the authors introduce a new version of the marine biogeochemical model, WOMBAT-lite. The updated model incorporates several new processes and requires tuning using observational datasets. The authors leverage machine learning methods to optimize the model. First, a machine learning model is trained on outputs from 512 experiments, each with different parameter sets (same parameters but different values), to predict 8 root mean square errors (RMSEs) relative to observational products. This trained machine learning model is used to perform a sensitivity analysis, identifying the parameters that most significantly impact the RMSEs — a total of 11 parameters are identified. Then, a second machine learning model is trained using outputs from 512 new experiments, focusing solely on the 11 selected parameters, to replicate a cost function that measures the deviation from observations. This trained model is utilized for optimization analysis to determine the optimal values and ranges of the 11 parameters. The optimized version of the model is then compared to observational data and a previously unoptimized version of WOMBAT. The new optimization approach proves to be successful, with the optimized model showing improvements across all evaluated variables, albeit to varying degrees.

### Overall assessment

(2) This technical paper is clearly written and presents a novel method for optimizing the new version of the biogeochemical model. The authors have made great efforts to describe the machine learning approach, detailing the sequential steps used first to identify key parameters and then to optimize them. I have a few major comments, that summarize as: 1) Additional justifications are needed to ensure that ten years of simulations are long enough, in relation to the model's intended usage and the influence of the optimization strategies. 2) Further discussion on alternative model tuning approaches would be beneficial. 3) The advantages of this optimization approach over simply selecting the best of the 512 experiments need to be further explained. 4) Further details on the machine learning algorithms may be necessary. I elaborate on these major comments below. Most of these comments can probably be addressed by adding text in the introduction or conclusive section of the manuscript. Additionally, I have a list of minor or specific comments and suggestions. Finally, given the length of the manuscript and the number of figures, any content that could be shortened would be beneficial. I tried to provide some suggestions. Overall, this is a quality piece of work, and I recommend it for publication after some minor revisions.

**We thank the reviewer for their thorough and constructive suggestions that have substantially improved the manuscript.**

### Major comments

(3) My first concern is the ten-year-long simulations used for conducting the sensitivity/optimization analysis. I understand the constraints associated with running a large number of longer simulations. Nonetheless, I would like to have a clearer picture of the equilibrium achieved in ten years. What are the drifts at various depths? Although ten years may be enough for the surface ocean, what about the deeper ocean that can impact the surface on longer time scale? The authors have noted a drift away from the optimal fit when simulations are extended to 100 years. Could the authors discuss the risk of further drift in

these simulations? Additionally, is the drift of the optimized simulation weaker compared to the best initial simulation or any of the 512 simulations? If the drift is indeed weaker, this would be a strong point in favor of the optimization strategy.

Both reviewers are correct to point out one of the biggest caveats of our work. 10 years is sufficient time for the upper ocean biogeochemistry (higher frequency cycling) to equilibrate into different states given the input parameter set, but it is certainly not long enough for the whole ocean biogeochemistry to equilibrate. Typically, this requires thousands of years of continuous simulation.

The choice of 10 years was due to three factors: (1) that we assess only the high frequency turnover of the ecosystem and biogeochemical components of the model, ignoring the low frequency, long timescale effects such as the drift the reviewer mentions; (2) due to computational constraints we cannot run 512 simulations for 100+ years each; and (3) even if computational constraints were not an issue, we wouldn't choose 100+ years because of the confounding effect of error in the ocean's physical state that propagates error into the biogeochemical fields. Because we initialise the model with observed temperature and salinity fields, the longer we continue the simulations the more that the model physical state will drift from the observed fields.

We fully acknowledge and address the reviewers concerns here by adding additional text discussing the advantages and disadvantages of our 10-year simulations.

Lines 253:263 – *“We chose to run the experiments for only 10 years, making a total of 5120 model years and at a nominal horizontal resolution of 1°. This short timescale was sufficient to assess the skill of the biogeochemical model, at least regarding its ecosystem component. Marine phytoplankton contribute half of all primary production in the Earth system (Field, 1998) but represent less than 1% of photosynthetic biomass (Friedlingstein et al., 2023; Le Quéré et al., 2005), meaning that they turn over quickly. Changes to key parameters within the ecosystem component therefore result in a rapid realisation of different patterns in biological states (e.g., chlorophyll and net primary production, among others). Our analyses and optimisation thus focus on the ecosystem component using 10-year model runs. We do acknowledge that longer-term, low frequency modes of variation exist in biogeochemical models, and to partially address this we completed 100-year simulations with optimal parameter sets. However, we also note that longer integrations risk the compounding of physical and biogeochemical model errors as the physical state drifts further from the observations. Optimisation of the biogeochemistry under these conditions can cause over-tuning of the biogeochemical parameter set that compensate for physical errors (e.g., Singh et al., 2025).”*

Lines 559:564 – *“Continuing to run the model forward for 100 years post initialization showed some degradation in the performance (red bars in Fig. 7). This is expected, since our optimisation procedure was trained on model output only 10 years post initialization due to computational constraints. Model outcomes drift further away from the target fields with longer integrations. Lower frequency variability and trends are thus missed by the optimisation that are nonetheless present in the biogeochemical model, and these play out as the model is integrated forward for longer.”*

*Lines 807:816: “Even with its optimal parameters, WOMBAT-lite suffered a loss in performance when run over 100 years compared to when run over only 10 years. Future iterations of surrogate-based optimisation would therefore benefit from extending the length of simulations done by initial set of sensitivity experiments. That said, significant savings in computation efficiency would be needed before this is possible with computationally demanding models, such as ocean biogeochemical models, but could be feasible by running the biogeochemical model offline from the ocean physics (e.g., Séférian et al., 2013). This approach would also eliminate any confounding errors caused by an evolution of the ocean’s physical state since the physical state would not be allowed to evolve. Future versions of WOMBAT, including WOMBAT-lite, WOMBAT-mid and WOMBAT-full, and their deployment into different configurations (e.g., higher resolution versions) would benefit from this methodology of optimisation.”*

(4) Somewhat connected with the previous point, could the authors specify/discuss the intended usage for which the model is optimized? For instance, will the model perform equally well when incorporated into an Earth System model for climate simulations? I am curious whether the optimization based on ten-year simulations and focusing on the surface ocean would remain effective during the longer processes, such as a thousands of years spin-up to achieve preindustrial equilibrium, followed by hundreds of years for simulating historical and future climate conditions.

The optimisation is immediately valid for ocean-only simulations and the parameter set defined here will be applied directly. It’s application within Australia’s Earth System Model, the ACCESS-ESM1.6, is however not so simple and will require additional tuning. Ideally, we would run the same surrogate machine learning optimisation procedure on 512 simulations with the ESM, but this is computationally expensive and prohibitive. We therefore accept that the optimal parameter set from these ocean-only experiments will need to be varied to deliver similar skill in the ESM.

We have added a sentence clarifying this in the introduction.

*Lines 111:114 – “This optimised version of WOMBAT-lite is intended for use within the Australian Community Climate and Earth System Simulator (ACCESS) umbrella of ocean-only model configurations (e.g., Kiss et al., 2020), while slight changes would be needed for the full earth system configurations to accommodate the differences in the physical state of the ocean (e.g., Law et al., 2017).”*

(5) Another major comments reside in emphasizing the utility of this optimization approach. Considering that the ML approach will identify the optimal parameter set in the space that has been explored, why not using the best performing of the 512 experiment? Could the authors comment a bit around that? I guess the optimization approach also provide some uncertainty and sensitivity quantification but can’t we get the same from the 512 experiments? What about comparing the optimal simulations with the best of the 512 initial simulations?

This comparison is made in the current Figure 7, where we show (yellow star) that the optimal parameter set outperforms the best of the 512 simulations in terms of the global cost

function. We also provide a new supplementary figure that shows the distribution of performances between the optimal and full set of sensitivity experiments.

This figure shows that the optimal parameter sets always perform well, with the majority of optimal experiments always performing better than at least 75% of sensitivity experiments (with the exception of surface dissolved iron, which performs better than at least 50%). For air-sea flux of CO<sub>2</sub> and particle sinking flux, one optimal experiment has skill exceeding the skill of all sensitivity experiments. For other target fields, the best performing of the optimal experiments either has slightly greater skill or slightly less skill than the best of the 512 sensitivity experiments. The consistently good performance of the optimal experiments, particularly related to the skill improvements in air-sea flux of CO<sub>2</sub>, shows that there is value in selecting the optimal parameter set over the best of the 512 sensitivity experiments. However, we acknowledge that good solutions do exist from within the sensitivity experiments.

Lines 557:560 – “These optimal versions of WOMBAT-lite show good fidelity to the target fields, with all registering good performances in terms of the global cost function that were as good as or better than the best of the 512 sensitivity experiments for the majority of the target fields (yellow bars in Fig. 7; Fig. S6).”

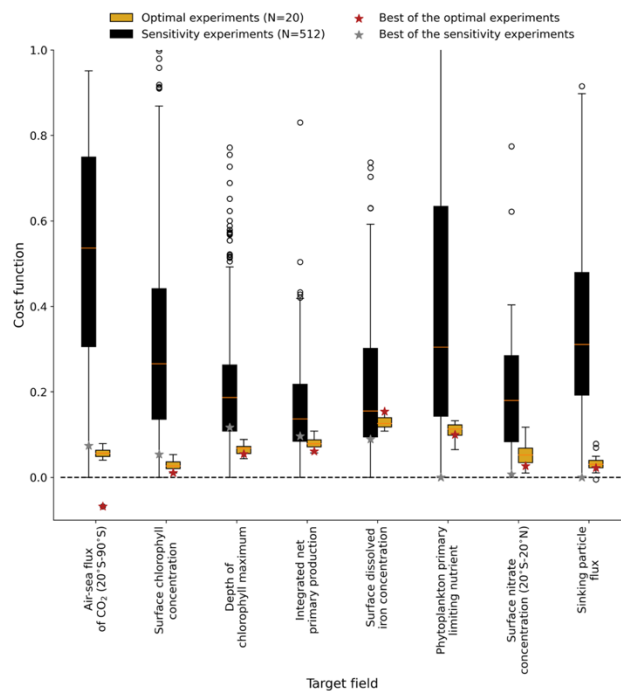

Figure S6. Performance of sensitivity and optimal experiments. Performance measured by the cost function of all 512 sensitivity experiments (black) against all 20 optimal experiments (gold) for each of the 8 target variables. The best performing of the 512 experiments (grey star) is compared with the best performing of the optimal experiments (red star).

(6) I would appreciate further discussion on model tuning and alternative approaches, particularly those employing ensembles/surrogate models/emulators. For instance, the work of Singh et al. (2025) and Williamson et al. (2017) seem relevant.

We have included a greater discussion of these papers and their relevance to our work in the discussion.

Lines 756:764 – *“Here we applied the surrogate-based method to WOMBAT-lite, optimised the model parameters and delivered improved performance in reproducing 8 target datasets. Other approaches do exist for optimisation of biogeochemical models, such as iterative ensemble methods (Singh et al., 2025), which do not rely on surrogate methods but instead uses ensembles to iteratively adjust either the initial state or the parameters towards their optimal values through regular data assimilation (Dowd et al., 2014). While this approach can provide time-evolving parameter optimisation, the surrogate approach employed herein represents another way to optimise the parameter set of a complex biogeochemical model, albeit statically, but importantly without large computation overhead. Once the surrogate is trained, it can be deployed cheaply to explore the parameter space in different ways, offering flexibility to select a new set of parameters with perhaps an emphasis on one target field (e.g., air-sea CO<sub>2</sub> flux) over another, if required. One disadvantage, however, is that the optimisation can only be as good as the skill of the surrogate, meaning that careful training is critical.”*

(7) Last major comment, while the approach is explained very well, I believe it lacks a detailed description of the machine learning techniques used. This aspect is beyond my area of expertise, so I cannot adequately assess it. However, a thorough explanation might be essential for reproducibility and for the benefit of readers interested in machine learning methods applied to a specific problem.

We point the reviewer to the code for sensitivity analysis and optimisation that is available at <https://github.com/Jyoteesh38/Bayesian-Optimization-of-the-World-Ocean-Model-of-Biogeochemistry-and-Trophic-dynamics-WOMBAT->. Following this code will allow any reader with access to python to reproduce the analysis in this study and this link is available under the “Code Availability” section.

## Minor and specific comments

### Introduction

(8) l. 47: Reformulation suggestion for clarification: "This component represents the growth..." -> "This component, in its simplest form, represents the growth..."

Done.

(9) l. 96: There is a typo, remove "apt" in "As an apt example, ..."

Done.

### Methods

(10) l. 163-179: I first counted 7 observation products before understanding that chlorophyll data were actually providing 2 products: depth of the maximum and surface chlorophyll. Can the authors reformulate to clarify?

Done.

Lines 190:192 - *“The extension of chlorophyll to depth allows for an assessment of patterns in the vertical, including spatiotemporal variations in the position of the deep chlorophyll maximum, which we assess in addition to surface chlorophyll concentrations.”*

(11) l. 172: Why optimizing to the CO<sub>2</sub> flux and not pCO<sub>2</sub>? The CO<sub>2</sub> flux is itself estimated from pCO<sub>2</sub>, thus introducing an additional source of potential errors in the observational target. Can the authors clarify/justify the choice?

Done.

Lines 194:196 - *“We opt for CO<sub>2</sub> fluxes rather than pCO<sub>2</sub> concentrations to also account for any error in the windspeed-dependent gas exchange formulation, which we do not update or optimise at this stage.”*

(12) l. 225: Can the authors give some example and eventually some reference (if they exists) to clarify what they have in mind?

Clarified.

Lines 261:263 – *“However, we also note that longer integrations risk the compounding of physical and biogeochemical model errors as the physical state drifts further from the observations. Optimisation of the biogeochemistry under these conditions can cause over-tuning of the biogeochemical parameter set that compensate for physical errors (e.g., Singh et al., 2025).”*

(13) l. 239: I find misleading using "Southern Ocean" for all the ocean south of 20°S. Here it includes some of the subtropical gyres. I found this misleading in some other part of the manuscript. Can the authors use another term?

Replaced “Southern Ocean” with “Southern Oceans” in all places where appropriate.

(14) l.271: For clarifying "... by comparing GPR predictions with WOMBAT-lite RMSE...", the authors can be specific and say that they compare the GPR predictions of RMSE with WOMBAT-lite RMSE.

Done.

Lines 309:311 – *“This is repeated across all folds, and predictions are aggregated. The GPR model accuracy is assessed through the goodness-of-fit ( $R^2$ ) metric by comparing GPR predictions of RMSE with WOMBAT-lite RMSE data, which indicates high accuracy (Fig. S2).”*



(15) l. 267-268: Is there one training for the 8 RMSE or 8 training? i.e 1 GPR model predicting 8 RMSE or 8 GPR model? Can the authors clarify?

8 GPRs are trained, one for each of the 8 target fields. Clarified this.

Lines 306:307 - “Next, *GPR models are trained for each observational target using these parameter samples as inputs and the normalized RMSE as the output.*”

(16) l. 276: Why not doing the optimization directly with the 24 parameters? Why having first a sensitivity analysis? (ie. why not doing step 10 just after step 5?) Can the authors clarify?

Clarified.

Lines 327:329 - “*This set of 512 sensitivity experiments are different from those generated during the sensitivity analysis because we now use a reduced set of only the most important parameters. This second iteration using a reduce parameter set and denser sampling of the parameter space is essential for the G-BO process (Reddy et al., 2024).*”

(17) l.285-297: Similar to comment 15, can the authors clarify? Is there one training for the 8 cost functions? Or one for the global cost function? Or 8 training for each cost function? To be entirely clear, the model is trained on a cost function (defined in Eq. 1 or 2), whereas for the sensitivity analysis, it focuses on the RMSE. Is that correct?

Clarified. And yes.

Lines 337:338 - “*Unlike the sensitivity analysis that measured model performance via the RMSE, this cost function penalizes poor correlations and bias and error in the variance by using an uncentered NRMSE.*”

## Results

(18) l. 349-356: Why not including  $PI_0$  in the most important parameters? On figure 5b it has a value of 0.05 for the depth of chlorophyll maximum, i.e. 5% if I understood correctly the threshold. Can the authors clarify?

Lines 415:416 - “*The initial slope of the photosynthesis-irradiance curve ( $PI^0$ ) was not included because it fell just below the 5% threshold (shown rounded up in Figure 5b) in its higher order effects.*”

(19) l. 405: The depth of the chlorophyll maximum is indeed heavily influenced by  $\alpha_a$  and  $\gamma_{0p}$  but only "in interaction" (i.e. panel b of Figure 5). It is the only target (with maybe iron but it is not as marked) that have 2 parameters standing out so much in interaction while no parameters seems to strongly influence it at first order. Can the authors comment one that?

Lines 473:475 - “*Increasing  $\alpha_a$  while simultaneously decreasing  $\gamma_p^0$ , for example, would cause an accelerated deepening of the nitracline since phytoplankton consume more nutrients but can also survive for longer under light limitation at depth.*”

(20) l. 412: It reads a bit strange to mention 2 additional parameters and not have them specified right away. There are mentioned just a bit after, but maybe the authors can slightly reformulate the paragraph so that 2 additional parameters are specified right after being mentioned.

Structure improved.

Lines 478:491 - *“Our optimisation procedure involved another 512 experiments that varied 13 parameters: the 11 parameters identified in the sensitivity analysis plus 2 additional parameters that were missed by our sensitivity analysis. The additional 2 parameters included wider variations in the biomass threshold of phytoplankton for allometric scaling ( $B_p^{thresh}$ ) from 0.01 to 1.0 (previously this had been varied from 0.01 to 0.1), as well as variations in the base scaler of temperature-dependent autotrophy ( $\beta_a$ ), which was previously held constant during the sensitivity experiments at a value of 1.066 ( $Q_{10} = 1.89$ ), following Eppley (1972), but have nonetheless been shown to vary between phytoplankton types (Anderson et al., 2021). We took the opportunity during the optimisation to vary these parameters. In our optimisation step, we explored a range of 1.040 to 1.080 ( $Q_{10}$  from 1.48 to 2.16) in  $\beta_a$  motivated by the results of Anderson et al. (2021). All remaining, insensitive parameters were held at their default values (Table 1). Thus, we explored variations in 13 parameters (11 parameters from the sensitivity analysis and 2 additional parameters) and sought their optimal values for best reproducing the 8 target fields (Fig. 3) by minimizing the global cost function (Eq. 2). The 512 experiments were used to calibrate the global cost function synthetically using the machine learning model.”*

(21) l. 413-418: Any reason why these parameters were not included in the sensitivity analysis? Can the authors clarify?

This was an oversight. We hope that the rephrasing in the previous response (#20) is sufficient to clarify this.

(22) l. 437: "... due to its complexation with organics..." is not clear to me. What is organics? Organic form of dFe? Can the authors clarify?

This is a detail of the cycling of dissolved iron in the ocean (Shaked et al., 2025; Tagliabue et al., 2017). As it is a very large topic, we refer the interested reader to these references.

(23) l. 506: In the subtropical or subpolar gyres?

Clarified.

(24) l. 504-506: It seems to me there is a very shallow chlorophyll maximum in the subtropical gyres that is not present in the observation (Fig. 8k, l). Any explanation? This is a bit contradictory with the "too deep maxima in the gyres." Can the authors clarify?

Lines 599:601 - *“We note that in places where the chlorophyll maxima appear very shallow in the subtropical gyres is where chlorophyll concentrations are so low as to not form any appreciable maximum at depth, essentially where the nitracline is so deep as to be placed in darkness.”*



(25) l. 486-506: What about the CO<sub>2</sub> flux? Can the authors mention that it receive a detailed analysis further in the paper.

Done.

Lines 595:596 – *“In the annual averages presented in Figure 8, there is little obvious change in air-sea CO<sub>2</sub> fluxes, but this hides compensating improvements in the seasonality which we detail in section 3.4.4.”*

(26) l. 483-484: "Our optimised WOMBAT-lite manages to show some improvement..." I don't find Figure 10b to be the most effective way to illustrate this. Instead, Figure 11 demonstrates the improvement in the seasonality of the CO<sub>2</sub> flux through better local correlation, whereas the correlation on Figure 10b actually decreases. I agree nonetheless that on figure 10 the amplitude seems to be a bit closer. It also seems to me that comparing a transition zone based on average is rather complex. Could the authors reformulate to provide a more precise explanation/description?

This is why we include both figures. It is also essential to show where the changes to parameter values may have altered things for the worse locally while improving them globally. We respectfully wish to keep Figure 10 as it is. We also note that we are forthcoming that there is much room for improvement regarding the model's representation of CO<sub>2</sub> fluxes.

(27) l. 593-599: This paragraph seems to be a repetition of the the one just before. Can the authors merge it and combine figure 10 and 11 (maybe not all panel of figure 10)?

Done. Combined the paragraphs, however we respectfully opt to maintain Figures 10 and 11 as separate.

Lines 674:703 – *“We directly compared the monthly CO<sub>2</sub> fluxes between an observation product (Chau et al., 2022) and WOMBAT-lite as well as the unoptimised model from January 1985 to December 2018. With optimal parameters, WOMBAT-lite shows improvement in its seasonality and regional agreement of CO<sub>2</sub> fluxes compared with an unoptimised version of the model (Fig. 10; Fig. 11). While CO<sub>2</sub> fluxes are strongly controlled by thermal processes in the subtropics and are thus well approximated by optimised and unoptimised versions alike (Fig. 10a; Fig. 11), CO<sub>2</sub> fluxes at higher latitudes are, however, more affected by biological drawdown and release (Mongwe et al., 2018; Takahashi et al., 2002). In the transition from subtropical to subantarctic zones (35°S-50°S) the observations show overall oceanic uptake of CO<sub>2</sub>, but importantly a greater uptake in the summer (Fig. 10b). Optimised WOMBAT-lite manages to show some improvement over the unoptimised model, with lower uptake in the winter and a trend towards uptake in the spring/summer. Nonetheless, this improvement is marginal in this zone and suggests that further improvement can be made in the future. The best match between WOMBAT-lite and the data is achieved in the Antarctic Circumpolar Current zone (50°S-65°S), where WOMBAT-lite shows good climatological correlations with the observations, while the unoptimised model shows negative correlations (Fig. 10c; Fig. 11). The flip from poor to good performance is caused by the net outgassing in the late winter and a trend towards oceanic uptake in the spring summer (Fig. 10c). Better seasonal correlations (0.87 → 0.96) are also*

*achieved in the Antarctic Zone (65°S-80°S), although with WOMBAT-lite potentially overestimating the summer flux of CO<sub>2</sub> into these waters (Fig. 10d).*

*Improvement in air-sea CO<sub>2</sub> fluxes is noteworthy from a zonally integrated perspective that incorporates the Northern Hemisphere (Fig. 12). North of 40°N, the oceanic uptake of CO<sub>2</sub> in the unoptimised version of the model exceeded the observations and this is somewhat reduced in WOMBAT-lite due to a substantial reduction in winter ingassing (Fig. 12b), while summer uptake is increased (Fig. 12c), resulting in a better match to observed CO<sub>2</sub> fluxes in the Northern Hemisphere (Fig. 12a) that is also visible in the temporal correlations (Fig. 11). Meanwhile, there is little difference between the optimised and unoptimised versions of the model in the low latitudes, emphasising how thermal changes dominate air-sea CO<sub>2</sub> fluxes in this region (Takahashi et al., 2002). Once again, in the Southern Ocean, we see clear improvements from a zonally integrated perspective. Winter outgassing is now achieved in WOMBAT-lite, although the zone of peak outgassing occurs too far north (Fig. 12c). Similarly, summer oceanic uptake is now achieved and is a closer match to the observations, although again the zones of maximum uptake are shifted too far north by roughly ~5° (Fig. 12b). Overall, the changes in the biogeochemical functionality of WOMBAT-lite show some improvements in reproducing observed air-sea CO<sub>2</sub> fluxes, although we note some degree of caution is required given the uncertainty in the observational-based product itself (Gloege et al., 2021; Hauck et al., 2023a)."*

(28) l. 593: The improvement are clear for the equatorial band (10S to 10N) and the high latitude (>50N and <30S). For the rest (10S-30S and 10N-50N) the unoptimized model is already well correlated with the observations and even better (darker red) in a few places. Can the authors reformulate to provide a more precise explanation/description?

*Lines 677:679 - "While CO<sub>2</sub> fluxes are strongly controlled by thermal processes in the subtropics and are thus well approximated by optimised and unoptimised versions alike (Fig. 10a; Fig. 11), CO<sub>2</sub> fluxes at higher latitudes are, however, more affected by biological drawdown and release (Mongwe et al., 2018; Takahashi et al., 2002)."*

(29) l. 593-599: Can the authors mentioned that the observations also have some caveats (Hauck et al., 2023; Gloege et al., 2021)?

Done.

*Lines 700:703 - "Overall, the changes in the biogeochemical functionality of WOMBAT-lite show some improvements in reproducing observed air-sea CO<sub>2</sub> fluxes, although we note some degree of caution is required given the uncertainty in the observational-based product itself (Gloege et al., 2021; Hauck et al., 2023)."*

(30) l. 602: "the unoptimised version of the model exceeded the observations." The optimized version also exceed the observation on figure 12a. Can the authors clarify their point?

Clarified.

Lines 692:695 - *“North of 40°N, the oceanic uptake of CO<sub>2</sub> in the unoptimised version of the model exceeded the observations and this is somewhat reduced in WOMBAT-lite due to a substantial reduction in winter ingassing (Fig. 12b), while summer uptake is increased (Fig. 12c), resulting in a better match to observed CO<sub>2</sub> fluxes in the Northern Hemisphere (Fig. 12a) that is also visible in the temporal correlations (Fig. 11).”*

(31) l.601-611: On figure 12 we see that the optimized version has a much better seasonal cycle in the high latitude (in line with what we see on figure 11). This important improvement does not appear so much on the annual average because of compensation between the errors in summer and winter. This should be stated more clearly.

Stated earlier as per your request and wording.

## Appendix

(32) l. 1430: There is typo, "is remineralised" is repeated.

Corrected.

## Figures

(33) Fig. 1: In the text of step (6) in the figure, consider to keep the same format as the other steps. Maybe something like "Run a global sensitivity..."

Done.

(34) Fig. 4: Can the authors add the performance of the optimized model and the 20 optimal experiments after 10 and 100 years.

Yes this can be added, but we opt for these to be shown as supplementary figures to not distract or clutter an already lengthy manuscript. This has been added as Supplementary Figure 6.

(35) Fig. 4: Why is the standard deviation of sinking detritus, NPP and chlorophyll so weak for many experiments? Can the authors explain/comment?

Likely that our NPP and sinking fluxes are too high in the gyres and too low in the productive regions. Or also that the measurements in the case of sinking particulate fluxes are highly localised in space and time, while the model necessarily produces smoothed (i.e., temporally and spatially averaged) output.

(36) Fig. 5: Should the sum of each row in the table be equal to one, including both tables a) and b)? Could the authors clarify the difference between the first-order and higher-order values? It would be helpful to include an explanation of this in the methods section, for example at the end of section 2.4.1.

The total order (the sum of both tables) does not necessarily sum to 1. The first-order indices sum to **at most** 1, while the total-order indices sum to **at least** 1. If there are no interactions, then the first and total-order indices are equal, and both the first and total-order indices sum to 1. We have included this information in the Figure legend.

(37) Fig. 6: The figure is not much referenced in the text, and because the values are normalized, it is difficult to compare them with Table 1 (I assume that the optimal values and ranges are derived from this figure in some way) and it does not provide a finer understanding of the optimal range. Perhaps it could be moved to the supplementary materials.

It is possible to move this to the supplement, but it is also a visualisation of a key outcome of the work. We defer to the editor, but have also added another reference to Figure 6 in the text as a way to show its importance.

(38) Fig. 10: As mentioned in comment 13, I find misleading the term Southern Ocean in the caption.

Corrected to “Southern Oceans”.

(39) Fig. 11: Can the authors add the latitude on the map.

Yes.

## References

Tarkeshwar Singh, François Counillon, Jerry Tjiputra, and Yiguo Wang. A Novel Ensemble-Based Parameter Estimation for Improving Ocean Biogeochemistry in an Earth System Model. *Journal of Advances in Modeling Earth Systems*, 17(2):e2024MS004237, 2025. ISSN 1942-2466. doi: 10.1029/2024MS004237.

Daniel B. Williamson, Adam T. Blaker, and Bablu Sinha. Tuning without over-tuning: Parametric uncertainty quantification for the NEMO ocean model. *Geoscientific Model Development*, 10(4):1789–1816, April 2017. ISSN 1991-959X. doi: 10.5194/gmd-10-1789-2017.

Judith Hauck, Cara Nissen, Peter Landschützer, Christian Rödenbeck, Seth Bushinsky, and Are Olsen. Sparse observations induce large biases in estimates of the global ocean CO<sub>2</sub> sink: An ocean model subsampling experiment. *Philosophical Transactions of the Royal Society A: Mathematical, Physical and Engineering Sciences*, 381(2249):20220063, May 2023. doi: 10.1098/rsta.2022.0063.

Lucas Gloege, Galen A. McKinley, Peter Landschützer, Amanda R. Fay, Thomas L. Frölicher, John C. Fyfe, Tatiana Ilyina, Steve Jones, Nicole S. Lovenduski, Keith B. Rodgers, Sarah Schlunegger, and Yohei Takano. Quantifying Errors in Observationally Based Estimates of Ocean Carbon Sink Variability. *Global Biogeochemical Cycles*, 35(4):e2020GB006788, February 2021. ISSN 1944-9224. doi: 10.1029/2020GB006788.
